# Supplementary material for: Chitotriose Enhanced Antitumor Activity of Doxorubicin through Egr1 Upregulation in MDA-MB-231 Cells
Source: MDPI journal article supplement (doi:10.3390/md22010026), 2023-12-29

**Table S1.** Primers for RT-qPCR

| Gene                            | Forward                | Reverse               |
|---------------------------------|------------------------|-----------------------|
| <i><math>\beta</math>-actin</i> | CTCTTCCAGCCTTCCTTCCTG  | CAGCACTGTGTTGGCGTACAG |
| <i>Cdkn1a</i>                   | TGTCCGTCAGAACCCATGC    | AAAGTCGAAGTTCCATCGCTC |
| <i>Colq</i>                     | CTTCCTACGGGGAATCTGTGT  | CAATGGCGTTTTGGGTGTTC  |
| <i>Egr1</i>                     | GGTCAGTGGCCTAGTGAGC    | GTGCCGCTGAGTAAATGGGA  |
| <i>Fgl2</i>                     | AGATTGCTCTGACTACTACGCA | TGCCATGTTCTGGTGAAGTTG |
| <i>Fos</i>                      | GGGGCAAGGTGGAACAGTTAT  | CCGCTTGGAGTGTATCAGTCA |
| <i>Gadd45a</i>                  | GAGAGCAGAAGACCGAAAGGA  | CACAACACCACGTTATCGGG  |
| <i>Jun</i>                      | TCCAAGTGCCGAAAAAGGAAG  | CGAGTTCTGAGCTTTCAAGGT |
| <i>Myc</i>                      | GTCAAGAGGCGAACACACAAC  | TTGGACGGACAGGATGTATGC |
| <i>Tmem61</i>                   | TGGTTGACATCCCCACTTACG  | GGCATCCCTCGATCCACTT   |

**Table S2.** mRNA level of *Cdh1* and *Egr1* through RNA-Seq analysis

| Gene ID     | log <sub>2</sub> (Chitotriose /CTL) | Q(Chitotriose /CTL) | Pathway Name                                                                                                                                                                                                                                                                                                                                                                      |
|-------------|-------------------------------------|---------------------|-----------------------------------------------------------------------------------------------------------------------------------------------------------------------------------------------------------------------------------------------------------------------------------------------------------------------------------------------------------------------------------|
| <i>Cdh1</i> | 1.13                                | 5.57E-05            | ko05226//Gastric cancer; ko05216//Thyroid cancer; ko04371//Apelin signaling pathway; ko04514//Cell adhesion molecules(CAMs); ko05218//Melanoma; ko05219//Bladder cancer; ko04015//Rap1 signaling pathway; ko05200//Pathways in cancer; ko04390//Hippo signaling pathway; ko05100//Bacterial invasion of epithelial cells; ko05213//Endometrial cancer; ko04520//Adherens junction |
| <i>Egr1</i> | 4.69                                | 0                   | ko05166//Human T-cell leukemia virus 1 infection; ko04371//Apelin signaling pathway; ko04933//AGE-RAGE signaling pathway in diabetic complications; ko04928//Parathyroid hormone synthesis, secretion and action; ko04912//GnRH signaling pathway                                                                                                                                 |

**Figure S1.** Investigation of IC<sub>50</sub> value of doxorubicin against MDA-MB-231 cell

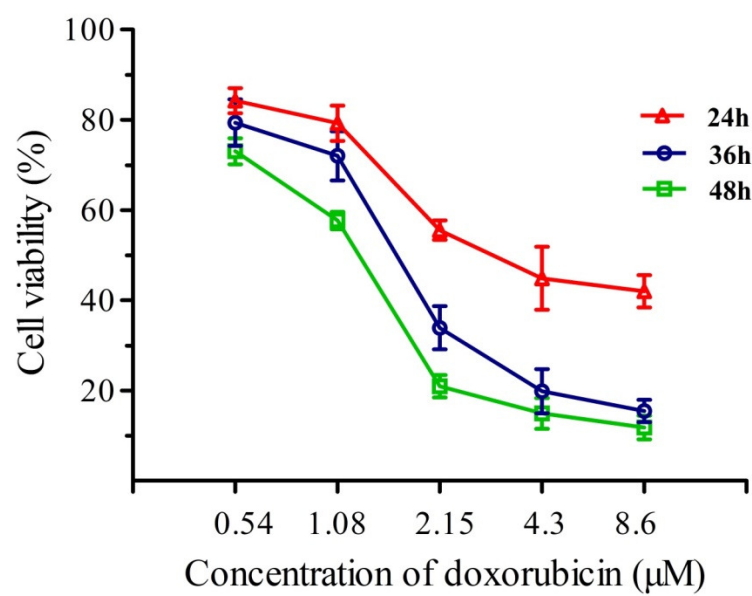

**Figure S1**

**Figure S2.** Effects of COS monomer and oligomers (DP 2-7) combined with doxorubicin on cell viability in MDA-MB-231 cells (n = 3 in each group). Asterisks (\*\*\*) indicate significant differences at  $p$ -value < 0.001 compared with DOX group.

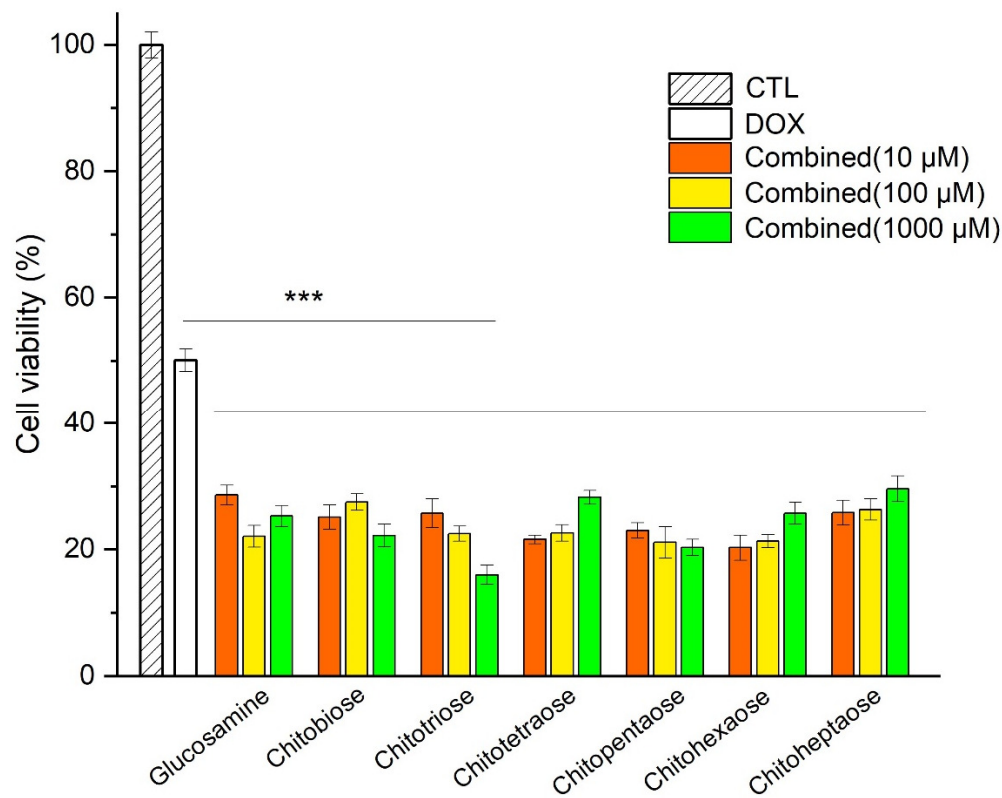

**Figure S2**

**Figure S3.** Original western blot images

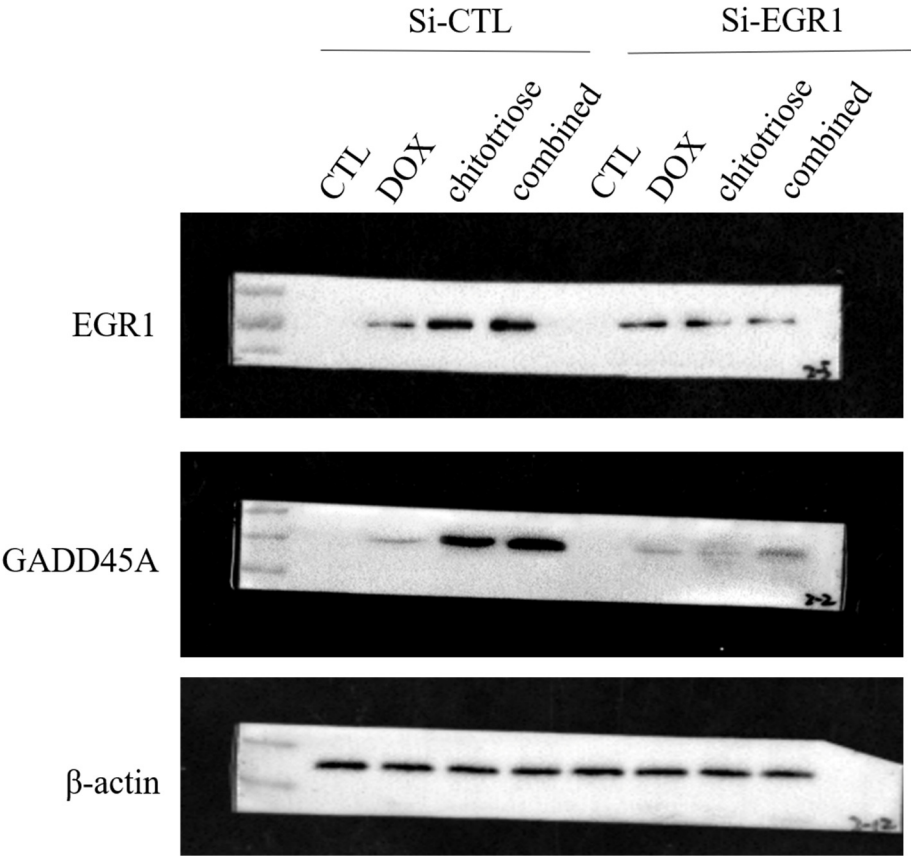

Supplement: s1 [file s1]
